# Supplementary material
Source: PubMed Central journal article supplement (PMC6493969)
Supplement: tpmd180783.SD1.pdf [file tpmd180783.SD1.pdf]

**Figure S1. Seasonality of EEEV activities in Florida, USA, 2005-2016.** Wavelet power spectrum of monthly confirmed seroconversion rates for; A) Entire Florida, B) Panhandle region, C) North region, D) North Central region, (E) South and South Central regions. Wavelet power spectrums identify changes in periodicities over time (left) and average periodicity (right). Power increases from blue to red and red indicates stronger periodicities. Black lines highlight statistically significant periodicities, the annual/one-year periodicities in this study.

**Figure S1**

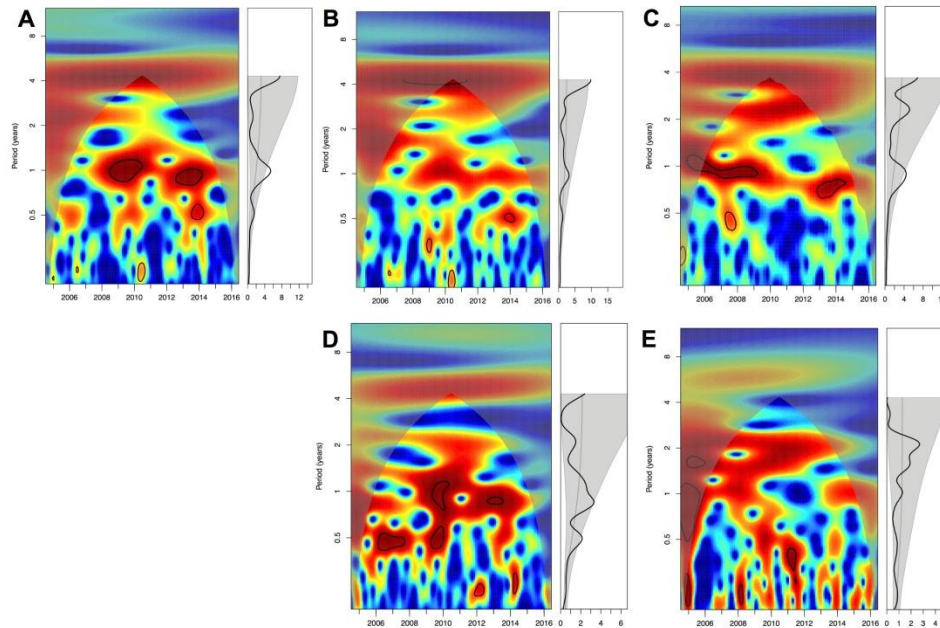

Table S1. Accession Number for 93 EEEV strains in study.

Note: Supplemental Table 1 will be available online in final publication.
